# Supplementary material
Source: Elsevier journal article supplement (https://www.sciencedirect.com/science/article/pii/S1575181320301005)
Supplement: mmc1 [file S1575181320301005:mmc1.pdf]

## Anexo N° 1

Encuesta sobre percepción sobre feedback, Versión docente (La otra versión utiliza las mismas preguntas, pero dirigidas a estudiantes)

| ESCALA DE APRECIACIÓN                                                                                                                                                                                                    |              |                |                     |                |
|--------------------------------------------------------------------------------------------------------------------------------------------------------------------------------------------------------------------------|--------------|----------------|---------------------|----------------|
| Estimado/a docente, por favor indicar, con qué frecuencia ud. ha realizado o realiza las siguientes acciones en los talleres disciplinares que dicta:                                                                    |              |                |                     |                |
| INDICADOR                                                                                                                                                                                                                | Nunca<br>(1) | A veces<br>(2) | Casi Siempre<br>(3) | Siempre<br>(4) |
| Le ha explicado a los estudiantes que entregará feedback o retroalimentación, como encuentro formativo, para ayudarles a comprender donde están y que cosas deben mejorar en el futuro.                                  |              |                |                     |                |
| Le ha hecho a los estudiantes preguntas abiertas en un comienzo, explorando sus necesidades y motivaciones. <i>Por Ejemplo: ¿Qué te interesaría discutir más en profundidad?</i>                                         |              |                |                     |                |
| Le ha facilitado a los estudiantes su proceso de autoevaluación, con preguntas sobre cómo ha sido su desempeño. <i>Por ejemplo: ¿Cómo crees que resultó la sesión?</i>                                                   |              |                |                     |                |
| Le ha reforzado positivamente a los estudiantes su desempeño adecuado. <i>Por ejemplo: Cuando le dijiste..... estuvo muy claro y preciso.</i>                                                                            |              |                |                     |                |
| Le ha descrito a los estudiantes los aspectos de su desempeño que se pueden modificar, evitando realizar juicios de valor                                                                                                |              |                |                     |                |
| Ha promovido el dialogo y la comprensión de los contenidos, haciendo pequeños resúmenes durante la sesión.                                                                                                               |              |                |                     |                |
| En el caso de haber comentado sobre aspectos subjetivos, ud. los ha abordado a través de preguntas abiertas que han estimulado la reflexión en los estudiantes. <i>Por ejemplo: ¿Qué piensas de eso? ¿Qué te parece?</i> |              |                |                     |                |
| Le ha permitido a los estudiantes agregar información sobre sus apreciaciones del proceso. <i>Por ejemplo: ¿tienes otras observaciones?</i>                                                                              |              |                |                     |                |
| Ha invitado a los estudiantes a verbalizar los aspectos relevantes sobre la información entregada. <i>Por ejemplo: ¿Qué aspectos de los analizados hoy son más relevantes para ti?</i>                                   |              |                |                     |                |
| Ha orientado a los estudiantes para elaborar un plan de acción a seguir, estableciendo acuerdos y/o compromiso en conjunto para el futuro. <i>Por ejemplo: Lo que haremos ahora es... Lo abordaremos así... etc.</i>     |              |                |                     |                |

Fuente: Basado en los 10 "tips" o recomendaciones para guiar una sesión de feedback individual, que han sido adaptadas y modificadas de la literatura. (Elaborado por Sra. Gricelda Gómez, Phillipa Moore, Carlos Reyes y Marisol Sirhan).
